# Supplementary material for: Factor Associated With Teacher Satisfaction and Online Teaching Effectiveness Under Adversity Situations: A Case of Vietnamese Teachers During COVID-19
Source: PubMed Central journal article supplement (PMC10311373; doi:10.1177/00220574211039483), 2021-11-06

## Appendix

### Appendix 1. The results of Structural Equation Model

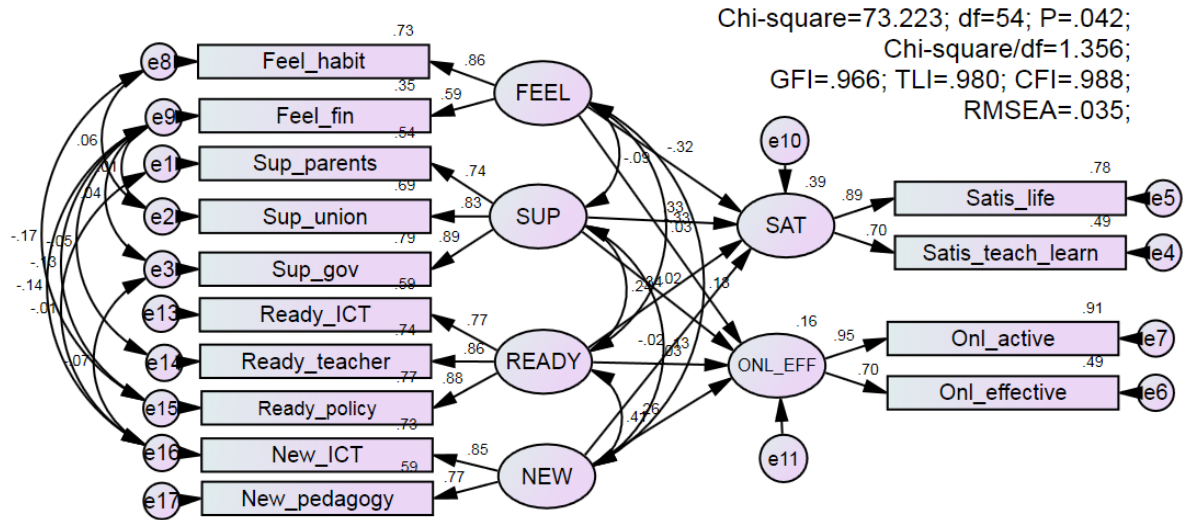

Supplement: sj-pdf-1-jex-10.1177_00220574211039483.pdf [file sj-pdf-1-jex-10.1177_00220574211039483.pdf]
